# Supplementary material
Source: PubMed Central journal article supplement (PMC3392892)
Supplement: cn200085z_si_001.pdf [file cn200085z_si_001.pdf]

**Identification of a Maleimide-Based Glycogen Synthase Kinase-3 (GSK-3)  
Inhibitor, BIP-135, that Prolongs the Median Survival Time of  $\Delta 7$  SMA KO  
Mouse Model of Spinal Muscular Atrophy.**

*Supporting Information*

Po C. Chen<sup>†</sup>, Irina N. Gaisina<sup>†</sup>, Bassem F. El-Khodor<sup>‡</sup>, Sylvie Ramboz<sup>‡</sup>, Nina R. Makhortova<sup>¥</sup>,  
Lee L. Rubin<sup>¥</sup>, and Alan P. Kozikowski<sup>†,\*</sup>

<sup>†</sup>*Department of Medicinal Chemistry and Pharmacognosy, College of Pharmacy, University of  
Illinois at Chicago, 833 South Wood Street, Chicago, Illinois 60612,*

<sup>‡</sup>*PsychoGenics Inc., 765 Old Sawmill River Road, Tarrytown, NY 10591*

<sup>¥</sup>*Department of Stem Cell and Regenerative Biology and Harvard Stem Cell Institute, Harvard  
University, 7 Divinity Avenue, Cambridge, MA 02138*

|                                                                    |    |
|--------------------------------------------------------------------|----|
| Synthetic Scheme of <b>BIP-135</b>                                 | S2 |
| Kinase Functional Assays and Selectivity Profile of <b>BIP-135</b> | S3 |

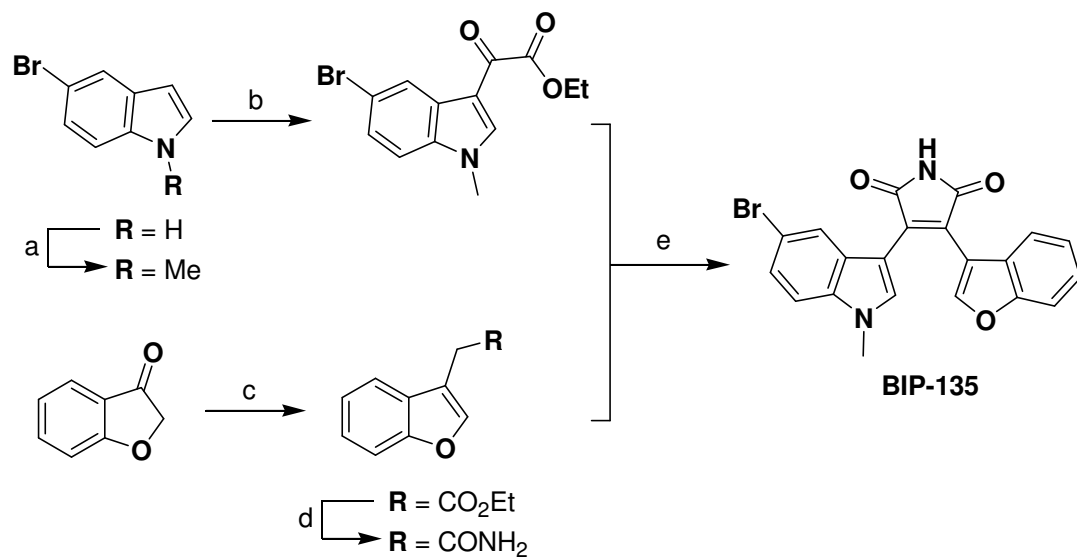

**Scheme 1.** Previously reported synthetic sequence of **BIP-135** used in scale up. Reagents and conditions: (a) NaH, MeI, DMF; (b)  $\text{Et}_2\text{OCCOCl}$ ,  $\text{Et}_2\text{O}$ ; (c)  $\text{Ph}_3\text{P}=\text{CH}_2\text{CO}_2\text{Et}$ , toluene,  $110^\circ\text{C}$ ; (d)  $\text{NH}_3(\text{gas}) / \text{MeOH}$ ,  $60^\circ\text{C}$ ; (e) 1.0 M *t*-BuOK in THF, THF,  $0^\circ\text{C}$ .

**Table 1.** Kinase Functional Assays and Selectivity Profile of **BIP-135**.

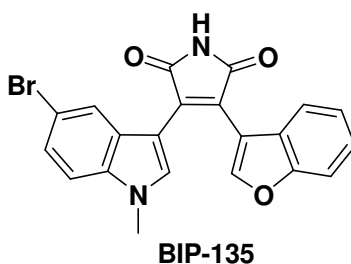

| Kinases        | IC <sub>50</sub> (nM) <sup>a,b</sup> | SI <sup>c</sup> | Kinases        | IC <sub>50</sub> (nM) <sup>a,b</sup> | SI <sup>c</sup> |
|----------------|--------------------------------------|-----------------|----------------|--------------------------------------|-----------------|
| GSK-3β         | 21                                   |                 | JNK1*          | NI                                   | >500            |
| GSK-3α         | 16                                   |                 | KDR*           | NI                                   | >500            |
| Akt            | NI                                   | >500            | LCK            | NI                                   | >500            |
| AMPK(A1/B1/G1) | 12890                                | 615             | MEK1           | NI                                   | >500            |
| Aurora A       | 11320                                | 538             | MKK6           | NI                                   | >500            |
| Axl*           | NI                                   | >500            | MSK1/RPS6KA5   | 4930                                 | 235             |
| c-Abl*         | NI                                   | >500            | NIK/MAP3K14    | NI                                   | >500            |
| c-Abl-T315I*   | NI                                   | >500            | P38α/MAPK14    | NI                                   | >500            |
| CAMK2δ         | 9980                                 | 475             | P38γ           | NI                                   | >500            |
| CDK1/cyclin B  | 7210                                 | 343             | p70S6K/RPS6KB1 | 14100                                | 671             |
| CDK2/cyclin A* | 3980                                 | 190             | PHKγ1          | 17400                                | 829             |
| CDK2/cyclin E  | 1950                                 | 93              | PKA*           | NI                                   | >500            |
| CDK4/cyclin D1 | 3090                                 | 147             | PKB*           | NI                                   | >500            |
| CDK5/p25       | 4010                                 | 191             | PDK1*          | NI                                   | >500            |
| CHK2           | 28700                                | 1370            | PI3Kα          | 870                                  | 41              |
|                |                                      |                 | (p110α/p85α)   |                                      |                 |
| CK2α           | NI                                   | >500            | PKCα*          | 61400                                | 2920            |
| c-Met*         | NI                                   | >500            | PKCβ1          | 980                                  | 47              |
| CSK            | NI                                   | >500            | PKCβ2          | 219                                  | 10              |
| c-Src*         | NI                                   | >500            | PKCμ/PRKD1     | NI                                   | >500            |
| DDR2           | NI                                   | >500            | PKCν/PRKD3     | NI                                   | >500            |
| DYRK1B         | 590                                  | 28              | PKD2/PRKD2     | NI                                   | >500            |
| EphB4*         | NI                                   | >500            | PKG1a          | 4260                                 | 203             |
| ERK2/MAPK1     | NI                                   | >500            | PLK3           | NI                                   | >500            |
| FAK*           | NI                                   | >500            | β-Raf-V599E*   | NI                                   | >500            |
| FGFR3          | NI                                   | >500            | Ret*           | NI                                   | >500            |
| FGFR3*         | NI                                   | >500            | ROCK2          | NI                                   | >500            |
| (K650E)        |                                      |                 |                |                                      |                 |
| Flt-3*         | NI                                   | >500            | RSK2           | 1490                                 | 71              |
| HER-1*         | NI                                   | >500            | SGK1           | NI                                   | >500            |
| HIPK4          | 13960                                | 662             | Tek*           | NI                                   | >500            |
| IGF-1R*        | NI                                   | >500            | TRKA           | 14500                                | 690             |
| IR             | NI                                   | >500            | TRKB           | 9150                                 | 436             |
| JAK-2*         | NI                                   | >500            | TRKC           | 1840                                 | 876             |

<sup>[\*]</sup> These kinases were previously screened and reported in our *J. Am. Chem. Soc.* Paper from 2006.<sup>16</sup>

<sup>[a]</sup> The ability of the enzymes to phosphorylate the substrate (20 μM final concentration) was assayed in the presence of 10 μM of ATP (Reaction Biology, Inc at [www.reactionbiology.com](http://www.reactionbiology.com))

<sup>[b]</sup> NI means no inhibition or compound activity (maximum concentration used = 10 μM)

<sup>[c]</sup> Kinase selectivity index (SI) of BIP-135 for GSK-3β over other kinases tested
